# Supplementary material
Source: PubMed Central journal article supplement (PMC3957885)
Supplement: AAC.02274-13_zac003142645so1.pdf [file AAC.02274-13_zac003142645so1.pdf]

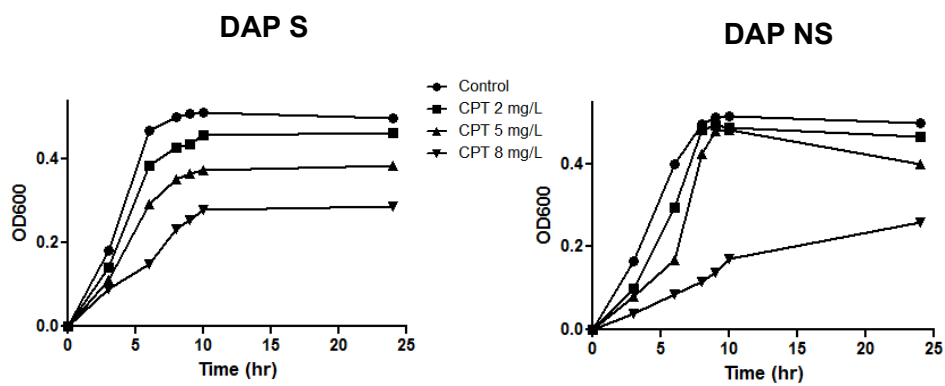

**Supplemental Figure 1.** Growth curves of daptomycin susceptible (left) and nonsusceptible VRE (right) in LB containing the specified concentrations of ceftaroline compared to antibiotic-free control.

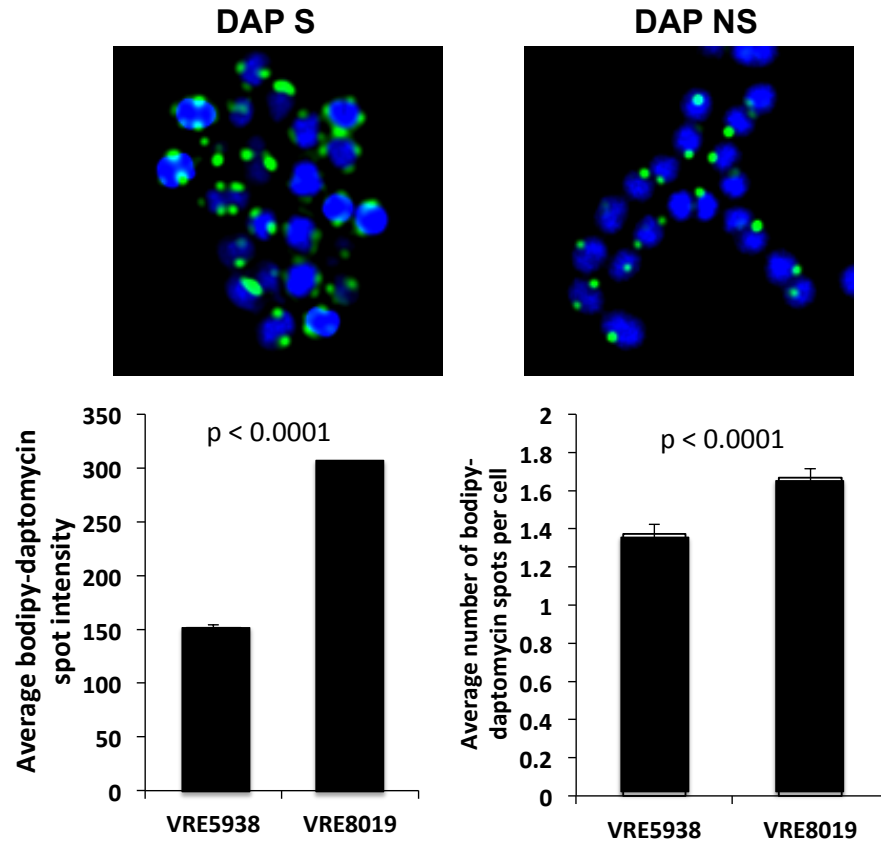

**Supplemental Figure 2.** Direct comparison of Bo-DAP (8 mg/L) binding to daptomycin susceptible and nonsusceptible VRE. Top panels show representative microscopy. Below is quantitative comparison of binding intensity (left) and number of binding foci/cell. Statistical significance measured by t-test.
